# Supplementary material
Source: MDPI journal article supplement (https://www.mdpi.com/2077-1444/12/3/150)
Supplement: s1 [file s1]

**Table S1.** Study on Stress, Spirituality, and Health Baseline Survey (SS-1): Survey Items, Domains and Response Categories.

| Domain               | Source                                                               | Scale Item Number | Item                                                                                                     | Response Categories                                                                                                                                           |
|----------------------|----------------------------------------------------------------------|-------------------|----------------------------------------------------------------------------------------------------------|---------------------------------------------------------------------------------------------------------------------------------------------------------------|
| Individual R/S Items | <i>De novo</i>                                                       |                   | To what extent do you view organized religion as positive or negative?                                   | 1. Very negative<br>2. Negative<br>3. Neutral or mixed<br>4. Positive<br>5. Very positive                                                                     |
|                      | Zinnbauer et al. 1997                                                |                   | Which of the statements best describes you?                                                              | 1. I am both spiritual and religious<br>2. I am spiritual but not religious<br>3. I am religious but not spiritual<br>4. I am neither spiritual nor religious |
|                      | Brief Multidimensional Measure of Religiousness/Spirituality (BMMRS) |                   | To what extent do you consider yourself a religious or spiritual person?                                 | 1. Not at all<br>2. Slightly<br>3. Moderately<br>4. Very                                                                                                      |
|                      | <i>De novo</i>                                                       |                   | Are you part of a religious congregation or community?                                                   | 1. Yes<br>2. No                                                                                                                                               |
|                      | Validated single item                                                |                   | How often do you attend religious services?                                                              | 1. Never<br>2. Rarely<br>3. About once a month<br>4. 2-3 times per month<br>5. Once a week<br>6. Several times per week                                       |
|                      | Religion, Aging, and Health Survey                                   |                   | How often does someone in your congregation or religion community show that they love or care for you?   | 1. Never<br>2. Once in a while<br>3. Fairly often<br>4. Very often                                                                                            |
|                      | Religion, Aging, and Health Survey                                   |                   | How often do you show someone in your congregation or religion community that you love or care for them? |                                                                                                                                                               |
|                      | Religion, Aging, and Health Survey                                   |                   | How often are people in your congregation or religious community critical of you or your lifestyle?      |                                                                                                                                                               |
|                      | <i>De novo</i>                                                       |                   | How often do you feel ignored or neglected by people in your congregation or religious community?        |                                                                                                                                                               |
|                      | <i>De novo</i>                                                       |                   | I believe in life after death                                                                            | 1. Definitely true of me                                                                                                                                      |

|                                     |                                                                      |             |                                                                                                                 |                                                                                                                                                          |
|-------------------------------------|----------------------------------------------------------------------|-------------|-----------------------------------------------------------------------------------------------------------------|----------------------------------------------------------------------------------------------------------------------------------------------------------|
|                                     | Validated single item                                                |             | I believe that God exists                                                                                       | 2. Tends to be true<br>3. Unsure<br>4. Tends not to be true<br>5. Definitely not true                                                                    |
| Religious Activities (RAS)          | <i>De novo</i>                                                       | RAS-1       | How often do you pray in a group other than a religious service?                                                | 1. Never<br>2. Several times a year<br>3. Several times a month<br>4. Once a week<br>5. More than once a week<br>6. Once a day<br>7. Several times a day |
|                                     | Duke University Religion Index (DUREL)                               | RAS-2       | How often do you pray by yourself?                                                                              |                                                                                                                                                          |
|                                     | Landmark Study of Spirituality and Health                            | RAS-3       | When you are by yourself, how often do you pray for others?                                                     |                                                                                                                                                          |
|                                     | Duke University Religion Index (DUREL)                               | RAS-4       | How often do you read scriptures?                                                                               |                                                                                                                                                          |
|                                     | Duke University Religion Index (DUREL)                               | RAS-5       | How often do you meditate?                                                                                      |                                                                                                                                                          |
|                                     | <i>De novo</i>                                                       | RAS-6       | How often do you practice yoga and/or pranayama?                                                                |                                                                                                                                                          |
|                                     | <i>De novo</i>                                                       | RAS-7       | How often do you practice Tai Chi?                                                                              |                                                                                                                                                          |
| Closeness to God (CtoG)             | Daily Spiritual Experience Scale (theistic)                          | CtoG-1      | I feel God's love or care for me through others                                                                 | 1. Definitely true of me<br>2. Tends to be true of me<br>3. Unsure<br>4. Tends not to be true of me<br>5. Definitely not true of me                      |
|                                     | <i>De novo</i>                                                       | CtoG-2      | God gives me the strength to do things that I otherwise could not do myself                                     |                                                                                                                                                          |
|                                     | Manifestation of God in the Body scale                               | CtoG-3      | God's spirit dwells in my body                                                                                  |                                                                                                                                                          |
|                                     | Daily Spiritual Experience Scale (theistic)                          | CtoG-4      | I desire to be closer or in union with God                                                                      |                                                                                                                                                          |
|                                     | <i>De novo</i>                                                       | CtoG-5      | God loves or cares for me unconditionally, in a way I could never earn                                          |                                                                                                                                                          |
|                                     | <i>De novo</i>                                                       | CtoG-6      | Throughout my life, God has come through for me                                                                 |                                                                                                                                                          |
|                                     | Duke University Religion Index (DUREL)                               | CtoG-7      | My relationship with God lies behind my whole approach to life                                                  |                                                                                                                                                          |
|                                     | <i>De novo</i>                                                       | CtoG-8      | When I pray I feel a deep sense of closeness to God                                                             |                                                                                                                                                          |
|                                     | <i>De novo</i>                                                       | CtoG-9      | I try to express my gratitude to God in my daily life                                                           |                                                                                                                                                          |
|                                     | <i>De novo</i>                                                       | CtoG-10     | God is the center of my life                                                                                    |                                                                                                                                                          |
| Religious and Spiritual Coping (RC) | Brief Multidimensional Measure of Religiousness/Spirituality (BMMRS) | Single item | To what extent is your religion or spirituality involved in understanding or dealing with stressful situations? | 1. Not at all<br>2. Not very much<br>3. Somewhat<br>4. Very much so                                                                                      |
| Religious Coping (RC)               | RCOPE (Positive)                                                     | RC-1        | In facing recent stressful life events...I saw my situation as part of God's plan                               | 1. Not at all<br>2. Somewhat                                                                                                                             |

|  |                                               |       |                                                                                                                            |                                                                   |
|--|-----------------------------------------------|-------|----------------------------------------------------------------------------------------------------------------------------|-------------------------------------------------------------------|
|  |                                               | RC-2  | In facing recent stressful life events...I tried to see how God might be trying to strengthen me in these situations       | 3. Quite a bit<br>4. Very much so                                 |
|  |                                               | RC-7  | In facing recent stressful life events...I tried to make sense of the situation with God                                   |                                                                   |
|  |                                               | RC-8  | In facing recent stressful life events...I worked together with God to relieve my worries                                  |                                                                   |
|  |                                               | RC-9  | In facing recent stressful life events...I did what I could and put the rest in God's hands                                |                                                                   |
|  |                                               | RC-10 | In facing recent stressful life events...I took control over what I could and gave the rest up to God                      |                                                                   |
|  |                                               | RC-11 | In facing recent stressful life events...I sought God's love or care                                                       |                                                                   |
|  |                                               | RC-12 | In facing recent stressful life events...I trusted that God would be by my side                                            |                                                                   |
|  | <i>De novo</i>                                | RC-17 | In facing recent stressful life events...I felt hopeful that God would help me get through one day at a time               | 1. Not at all<br>2. Somewhat<br>3. Quite a bit<br>4. Very much so |
|  | <i>De novo</i>                                | RC-18 | In facing recent stressful life events...I looked to my faith in God for hope about the future                             |                                                                   |
|  | RCOPE (Negative)                              | RC-3  | In facing recent stressful life events...I wondered what I did for God to punish me                                        |                                                                   |
|  |                                               | RC-4  | In facing recent stressful life events...I wondered if God allowed this to happen because of my wrongdoings                |                                                                   |
|  |                                               | RC-5  | In facing recent stressful life events...I believed the devil or evil spirits were responsible for my situation            |                                                                   |
|  |                                               | RC-6  | In facing recent stressful life events...I felt as though the devil, or an evil spirit was trying to turn me away from God |                                                                   |
|  |                                               | RC-13 | In facing recent stressful life events...I wondered whether God had abandoned me                                           |                                                                   |
|  |                                               | RC-14 | In facing recent stressful life events...I questioned God's love or care for me                                            |                                                                   |
|  | Religious and Spiritual Struggles Scale (RSS) | RC-15 | In facing recent stressful life events...I felt confused about my religious or spiritual beliefs                           |                                                                   |
|  |                                               | RC-16 | In facing recent stressful life events...I felt troubled by doubts or questions about my religion or spirituality          |                                                                   |
|  |                                               | GQ-1  | I have so much in life to be grateful for                                                                                  | 1. Strongly disagree                                              |

|                                                    |                                                 |          |                                                                                   |                                                                                       |
|----------------------------------------------------|-------------------------------------------------|----------|-----------------------------------------------------------------------------------|---------------------------------------------------------------------------------------|
| Gratitude (GQ)                                     | The Gratitude Questionnaire (GQ)                | GQ-2     | If I had to list everything that I felt grateful for it would be a very long list | 2. Somewhat disagree<br>3. Neutral<br>4. Somewhat agree<br>5. Strongly agree          |
| Forgiveness                                        | Religion, Aging, and Health Survey              | NFGve-1  | Before I can forgive others, they must promise not to do the same thing again     | 1. Strongly disagree<br>2. Disagree<br>3. Agree<br>4. Strongly agree                  |
|                                                    | Religion, Aging, and Health Survey              | NFGve-2  | I find it hard to forgive myself for some of the things I have done wrong         |                                                                                       |
|                                                    | Validated single item                           | NFGve-3  | I have forgiven those who have hurt me                                            |                                                                                       |
|                                                    | Validated single item                           | NFGve-4  | I feel that others have not forgiven me for things I have done                    |                                                                                       |
| Non-theistic Daily Spiritual Experiences (NT-DSES) | Daily Spiritual Experience Scale (non-theistic) | NTDSES-1 | I experience a connection to all of life                                          | 1. Never<br>2. Once in a while<br>3. Some days<br>4. Every day<br>5. Many times a day |
|                                                    |                                                 | NTDSES-2 | I feel deep inner peace or harmony                                                |                                                                                       |
|                                                    |                                                 | NTDSES-3 | I am touched by the beauty of creation                                            |                                                                                       |
|                                                    |                                                 | NTDSES-4 | I feel a selfless caring for others                                               |                                                                                       |

## References

- Demir E. The Evolution of Spirituality, Religion and Health Publications: Yesterday, Today and Tomorrow. *J Relig Health* 2019; 58: 1–13. doi:10.1007/s10943-018-00739-w
- Koenig H. G. Religion, spirituality, and health: the research and clinical implications. *ISRN Psychiatry*. 2012; 2012: 278730. doi:10.5402/2012/278730
- Shields AE, Balboni TA. Building towards common psychosocial measures in U.S. cohort studies: principal investigators' views regarding the role of religiosity and spirituality in human health. *BMC Public Health* 2020; 20: 973. doi:10.1186/s12889-020-08854-8
- Smith C, Faris R. Religion and American Adolescent Delinquency, Risk Behaviors and Constructive Social Activities. A Research Report of the National Study of Youth and Religion. 2002.
- Butler TL, Fraser GE, Beeson WL, et al. Cohort profile: The Adventist Health Study-2 (AHS-2). *Int J Epidemiol* 2008; 37: 260–265. doi:10.1093/ije/dym165
- Beeson WL, Mills PK, Phillips RL, Andress M, Fraser GE. Chronic disease among Seventh-day Adventists, a low-risk group. Rationale, methodology, and description of the population. *Cancer*. 1989; 64: 570–581. doi:10.1002/1097-0142(19890801)64:3<570::aid-cnrc2820640303>3.0.co;2-4
- RIS Atlas. <https://atlas.mgh.harvard.edu/querytool/>.
- VanderWeele T. Religion and health: A synthesis. In *Spirituality and religion within the culture of medicine: From evidence to practice*. Edited by Balboni M. and Peteet J. Oxford University Press, 2017, pp. 357–401.
- Center PR. *Religious Landscape Study* 2014.
- Cockerham WC, Hamby BW, Oates GR. The Social Determinants of Chronic Disease. *Am J Prev Med* 2017; 52: S5–S12. doi:10.1016/j.amepre.2016.09.010
- Pargament K, Feuille M, Burdzy D. The Brief RCOPE: Current Psychometric Status of a Short Measure of Religious Coping. *Religions* 2011: 51–76.
- Underwood LG, Teresi JA. The daily spiritual experience scale: development, theoretical description, reliability, exploratory factor analysis, and preliminary construct validity using health-related data. *Ann Behav Med* 2002; 24: 22–33. doi:10.1207/S15324796ABM2401\_04
- Russell C, Palmer JR, Adams-Campbell LL, Rosenberg L. Follow-up of a large cohort of Black women. *Am J Epidemiol* 2001; 154: 845–853. doi:10.1093/aje/154.9.845
- Lavange LM, Kalsbeek WD, Sorlie PD, et al. Sample design and cohort selection in the Hispanic Community Health Study/Study of Latinos. *Ann Epidemiol* 2010; 20: 642–649. doi:10.1016/j.annepidem.2010.05.006
- Kanaya AM, Kandula N, Herrington D, et al. Mediators of Atherosclerosis in South Asians Living in America (MASALA) study: objectives, methods, and cohort description. *Clin Cardiol* 2013; 36: 713–720. doi:10.1002/clc.22219
- Bao Y, Bertoia ML, Lenart EB, et al. Origin, Methods, and Evolution of the Three Nurses' Health Studies. *Am J Public Health* 2016: 1573–1581. vol. 9.
- Lee ET, Welty TK, Fabsitz R, et al. The Strong Heart Study. A study of cardiovascular disease in American Indians: design and methods. *Am J Epidemiol* 1990;132: 1141–1155. doi:10.1093/oxfordjournals.aje.a115757
- Ware J, Jr., Kosinski M, Keller SD. A 12-Item Short-Form Health Survey: construction of scales and preliminary tests of reliability and validity. *Med Care* 1996; 34: 220–233. doi:10.1097/00005650-199603000-00003
- Koenig HG, Büssing A. The Duke University Religion Index (DUREL): A Five-Item Measure for Use in Epidemiological Studies. Review. *Religions*. 2010; 1: 78–85. doi:10.3390/rel1010078
- Fetzer Institute. Multidimensional Measurement of Religiousness/Spirituality for Use in Health Research: A Report of the Fetzer Institute/National Institute on Aging Working Group. Health Research Program Area of the John E. Fetzer Institute. <http://fetzer.org/resources/multidimensional-measurement-religiousnessspirituality-use-health-research>
- Pargament KI, Koenig HG, Perez LM. The many methods of religious coping: development and initial validation of the RCOPE. *J Clin Psychol*. 2000; 56: 519–543. doi:10.1002/(sici)1097-4679(200004)56:4<519::aid-jclp6>3.0.co;2-1
- Exline JJ, Pargament KI, B. GJ, Yali AM. The Religious and Spiritual Struggles Scale: Development and initial validation. *Psychology of Religion and Spirituality* 2014; 6:208–222. doi:10.1037/a0036465
- Mccullough ME, Emmons RA, Tsang JA. The grateful disposition: a conceptual and empirical topography. *J Pers Soc Psychol*. 2002; 82: 112–127.
- Cozier YC, Yu J, Wise LA, et al. Religious and Spiritual Coping and Risk of Incident Hypertension in the Black Women's Health Study. *Ann Behav Med*. Nov 2018; 52: 989–998. doi:10.1093/abm/kay001
- Spence ND, Farvid MS, Warner ET, et al. Religious Service Attendance, Religious Coping, and Risk of Hypertension in Women Participating in the Nurses' Health Study II. *Am J Epidemiol*. 2020; 189:193–203. doi:10.1093/aje/kwz222
- Thompson B. Exploratory and confirmatory factor analysis: Understanding concepts and applications. *PsycNET* 2019; doi:10.1037/10694-000
- Cohen J. *Statistical Power Analysis for the Behavioral Science*. 2nd edition ed. LERlbaum Associates; 1988.
- Horn JL. A rationale and test for the number of factors in factor analysis | SpringerLink. 2019; doi:10.1007/BF02289447

- O'Connor BP. SPSS and SAS programs for determining the number of components using parallel analysis and Velicer's MAP test | SpringerLink. 2019; doi:10.3758/BF03200807
- Funder DC, Ozer DJ. Evaluating Effect Size in Psychological Research: Sense and Nonsense. 2019; doi:10.1177\_2515245919847202
- Park CL, Holt CL, Le D, Christie J, Williams BR. Positive and Negative Religious Coping Styles as Prospective Predictors of Well-Being in African Americans. *Psycholog Relig Spiritual* 2018; 10: 318–326. doi:10.1037/rel0000124
- Ng GC, Mohamed S, Sulaiman AH, Zainal NZ. Anxiety and Depression in Cancer Patients: The Association with Religiosity and Religious Coping. *J Relig Health* 2017; 56: 575–590. doi:10.1007/s10943-016-0267-y
- Ahles JJ, Mezulis AH, Hudson MR. Religious coping as a moderator of the relationship between stress and depressive symptoms. *Psychology of Religion and Spirituality* 2016; 8: 228.
